# Supplementary figures and images for: Delivery of AIB1 siRNA by Ca2+/PEI/heparin composite nanoparticles effectively inhibits the growth of human breast cancer
Source: Royal Society of Chemistry journal article supplement (doi:10.1039/c5tb01490e), 2015-01-01

a

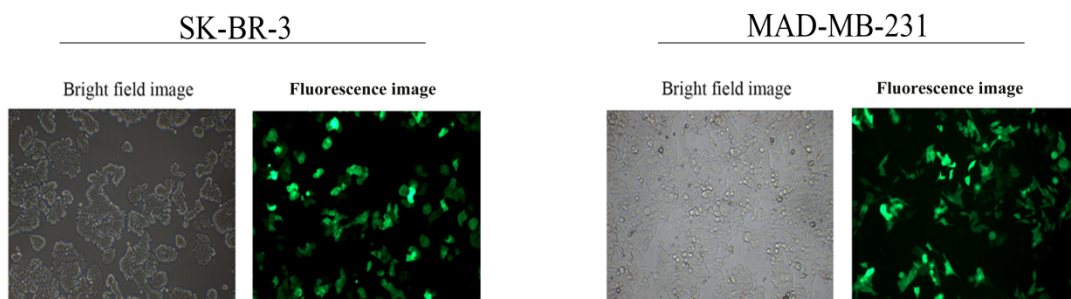

b

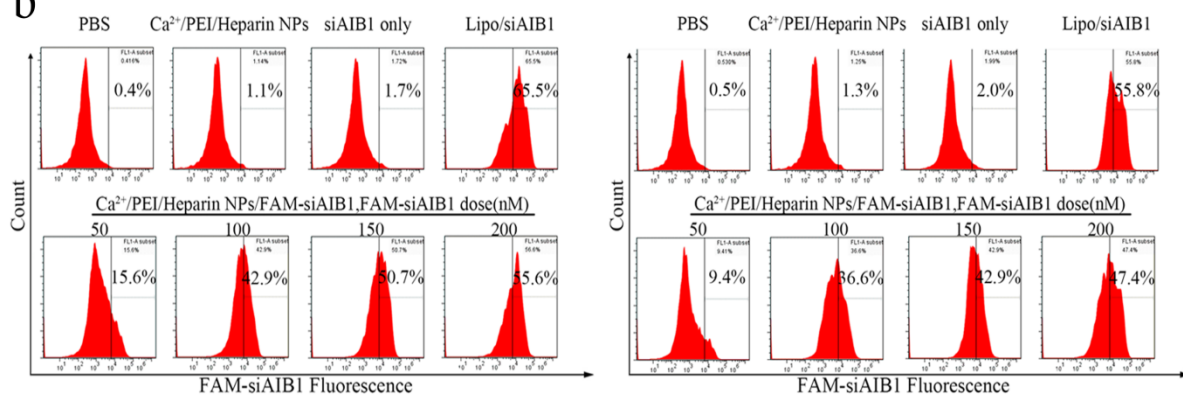

Supplement: c5tb01490e1.pdf [file c5tb01490e1.pdf]
